# Supplementary material for: A highly emissive Zn(ii)-pyridyl-benzimidazolyl-phenolato-based chemosensor: detection of H2PO4−via “use” and “throw” device fabrication
Source: Royal Society of Chemistry journal article supplement (doi:10.1039/d1ay01575c), 2021-01-01
Supplement: d1ay01575c1.pdf [file d1ay01575c1.pdf]

Supplementary Materials

**A Highly Emissive Zn(II)-pyridyl-benzimidazolyl-phenolato based Chemosensor:  
Detection of  $\text{H}_2\text{PO}_4^-$  via “Use” and “Throw” Device Fabrication**

Sunanda Dey, Sukanya Paul, Kingshuk Debsharma, Chittaranjan Sinha\*

| Sl. No. | Contents                                                                                                                                                                        | Figure/Table No. |
|---------|---------------------------------------------------------------------------------------------------------------------------------------------------------------------------------|------------------|
| 1.      | Crystal data and refine parameters for probe HL.                                                                                                                                | Table S1         |
| 2.      | $^1\text{H}$ NMR spectrum of HL                                                                                                                                                 | Fig. S1          |
| 3.      | $^{13}\text{C}$ NMR spectrum of HL                                                                                                                                              | Fig. S2          |
| 4.      | ESI-MS spectrum of HL                                                                                                                                                           | Fig. S3          |
| 5.      | IR spectrum of HL                                                                                                                                                               | Fig. S4          |
| 6.      | Supramolecular assembly of HL along ‘c-axis’                                                                                                                                    | Fig. S5          |
| 7.      | Change in the absorption spectrum of HL (50 $\mu\text{M}$ ) on gradual addition of $\text{Zn}^{2+}$ (0-50 $\mu\text{M}$ ); inset: absorption spectrum of HL and its Zn-complex. | Fig. S6          |
| 8.      | Some selective torsional angles present in the free probe HL (obtained from X-Ray structure).                                                                                   | Table S2         |
| 9.      | X-Ray structure of HL exhibiting twisting framework (two different views).                                                                                                      | Fig. S7          |
| 10.     | Limit of detection of $\text{Zn}^{2+}$ by the probe HL                                                                                                                          | Fig. S8          |
| 11.     | Some of the reported $\text{Zn}^{2+}/\text{H}_2\text{PO}_4^-$ selective probe along with LOD.                                                                                   | Table S3         |
| 12.     | Change in the absorption spectrum of HL (50 $\mu\text{M}$ ) on gradual addition of $\text{Zn}^{2+}$ (0-50 $\mu\text{M}$ ); inset: absorption spectrum of HL and its Zn-complex. | Fig. S9          |
| 13.     | pH effect on HL for $\text{Zn}^{2+}$ sensing                                                                                                                                    | Fig. S10         |
| 14.     | Binding constant $K_d$ evaluated from Benesi-Hildebrand plot of probe HL towards $\text{Zn}^{2+}$ ion                                                                           | Fig. S11         |
| 15.     | Job’s plot between $\text{Zn}^{2+}$ and HL.                                                                                                                                     | Fig. S12         |
| 16.     | ESI-MS spectrum of HL- $\text{Zn}^{2+}$ complex                                                                                                                                 | Fig. S13         |
| 17.     | Time-course of emission intensity of HL upon addition of 1 equivalent $\text{Zn}^{2+}$ .                                                                                        | Fig. S14         |
| 18.     | IR spectrum of HL- $\text{Zn}^{2+}$ complex.                                                                                                                                    | Fig. S15         |
| 19.     | Merge IR spectrum of HL and HL- $\text{Zn}^{2+}$ complex ( $[\text{Zn}(\text{L}^1)\text{OAc}]$ ).                                                                               | Fig. S16         |
| 20.     | DFT optimized structure of probe HL and its zinc complex using B3LYP method.                                                                                                    | Fig. S17         |
| 21.     | Some selected bond length of HL obtained from single crystal and compared with theoretical optimized structure.                                                                 | Table S4         |

|     |                                                                                                                                                          |           |
|-----|----------------------------------------------------------------------------------------------------------------------------------------------------------|-----------|
| 22. | Selected bond angles of probe HL from the crystal unit and its comparison with the optimized structure.                                                  | Table S5  |
| 23. | Selected frontier molecular orbitals of HL along with their energies.                                                                                    | Table S6  |
| 24. | Selected frontier molecular orbitals of HL-Zn <sup>2+</sup> complex along with their energies.                                                           | Table S7  |
| 25. | Probable electronic transition of HL from TD-DFT calculation.                                                                                            | Table S8  |
| 26. | Probable electronic transition of HL-Zn <sup>2+</sup> from TD-DFT calculation.                                                                           | Table S9  |
| 27. | DFT optimized structure of Zn-complex exhibiting twisting framework                                                                                      | Fig. S18  |
| 28. | Some selective torsional angles present in the Zn-complex.                                                                                               | Table S10 |
| 29. | Limit of detection (LOD) determination for H <sub>2</sub> PO <sub>4</sub> <sup>-</sup> by [Zn(L <sup>1</sup> )OAc] complex                               | Fig. S19  |
| 30. | Binding constant, K <sub>d</sub> for H <sub>2</sub> PO <sub>4</sub> <sup>-</sup>                                                                         | Fig. S20  |
| 31. | Change in UV-Vis absorption spectra of HL-Zn <sup>2+</sup> on gradual addition of H <sub>2</sub> PO <sub>4</sub> <sup>-</sup>                            | Fig. S21  |
| 32. | ESI-MS spectrum in addition of H <sub>2</sub> PO <sub>4</sub> <sup>-</sup> to the in-situ generated HL-Zn <sup>2+</sup> complex                          | Fig. S22  |
| 33. | <sup>1</sup> H NMR spectra of HL+Zn <sup>2+</sup> (1.0 eqv.) and HL+Zn <sup>2+</sup> (1.0 eqv.)+ H <sub>2</sub> PO <sub>4</sub> <sup>-</sup> (1.0 eqv.). | Fig. S23  |
| 34. | Time-course of intensity quenching of [Zn(L <sup>1</sup> )OAc] upon addition of 1 equivalent H <sub>2</sub> PO <sub>4</sub> <sup>-</sup> .               | Fig. S24  |
| 35. | Paper kit detection: Zn-complex in presence of different anions                                                                                          | Fig. S25  |
| 36. | Photographs of HL coated filter paper with hand written images and after washing with water; λ <sub>ex</sub> , 365 nm                                    | Fig. S26  |
| 37. | References                                                                                                                                               |           |

**Table S1** Crystal data and refine parameters for probe HL.

|                                            |                                                               |
|--------------------------------------------|---------------------------------------------------------------|
| Empirical formula                          | C <sub>27</sub> H <sub>23</sub> N <sub>3</sub> O <sub>2</sub> |
| Formula weight                             | 421.48                                                        |
| Temperature (K)                            | 273(2)                                                        |
| System                                     | orthorhombic                                                  |
| Space group                                | P2 <sub>1</sub> 2 <sub>1</sub> 2 <sub>1</sub>                 |
| a (Å)                                      | 9.0805(9)                                                     |
| b (Å)                                      | 10.1637(10)                                                   |
| c (Å)                                      | 23.374(2)                                                     |
| α=β=γ /°                                   | 90                                                            |
| V (Å) <sup>3</sup>                         | 2157.2 (4)                                                    |
| Z                                          | 4                                                             |
| D(cal)/g cm <sup>-3</sup>                  | 1.298                                                         |
| μ/mm <sup>-1</sup>                         | 0.083                                                         |
| λ(Å)                                       | 0.71073                                                       |
| data[I > 2σ (I)]/params                    | 3805/279                                                      |
| Final R indices [I > 2σ(I)] <sup>a,b</sup> | R <sub>1</sub> = 0.1007<br>wR <sub>2</sub> = 0.1951           |
| GOF <sup>c</sup>                           | 1.118                                                         |

<sup>a</sup>R<sub>1</sub> = Σ||F<sub>o</sub>| - |F<sub>c</sub>||/Σ|F<sub>o</sub>|; <sup>b</sup>wR<sub>2</sub> = {Σ[w(F<sub>o</sub><sup>2</sup> - F<sub>c</sub><sup>2</sup>)<sup>2</sup>]/Σ[w(F<sub>o</sub><sup>2</sup>)<sup>2</sup>]}<sup>1/2</sup>; w = [σ<sup>2</sup>(F<sub>o</sub>)<sup>2</sup> + (0.1003P)<sup>2</sup> + 4.9693P]<sup>-1</sup> (F<sub>o</sub><sup>2</sup> + 2F<sub>c</sub><sup>2</sup>)/3; <sup>c</sup> Goodness-of-fit

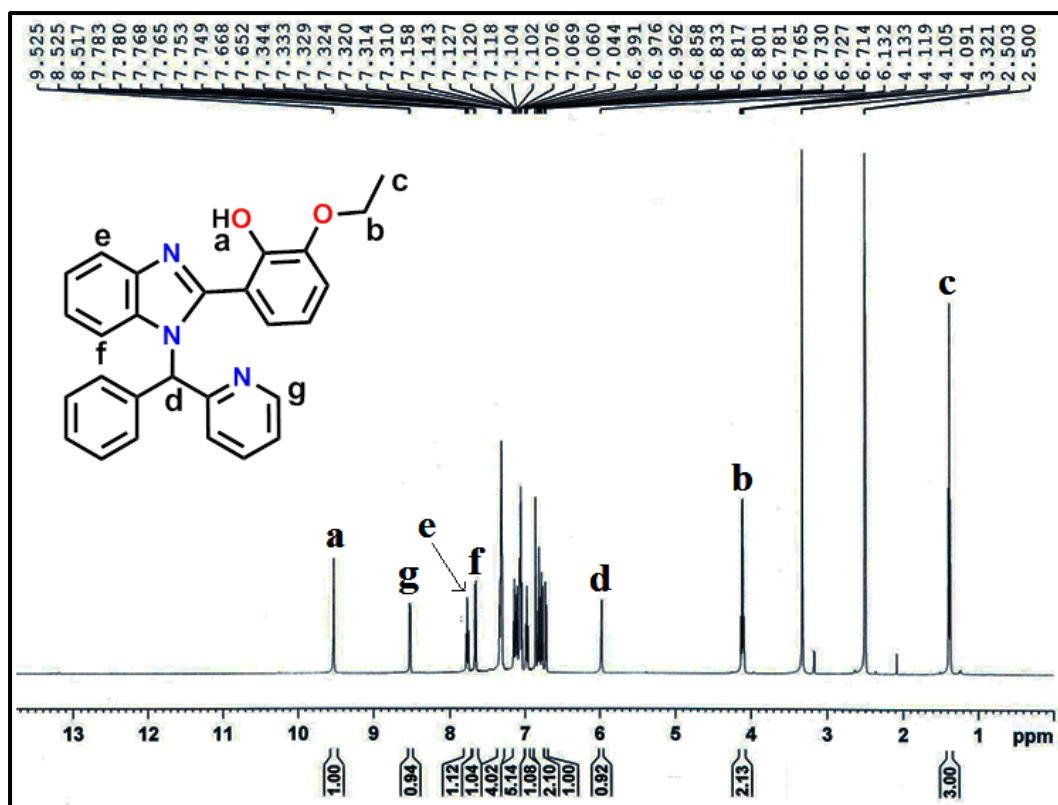

Fig. S1 <sup>1</sup>H NMR spectrum of HL.

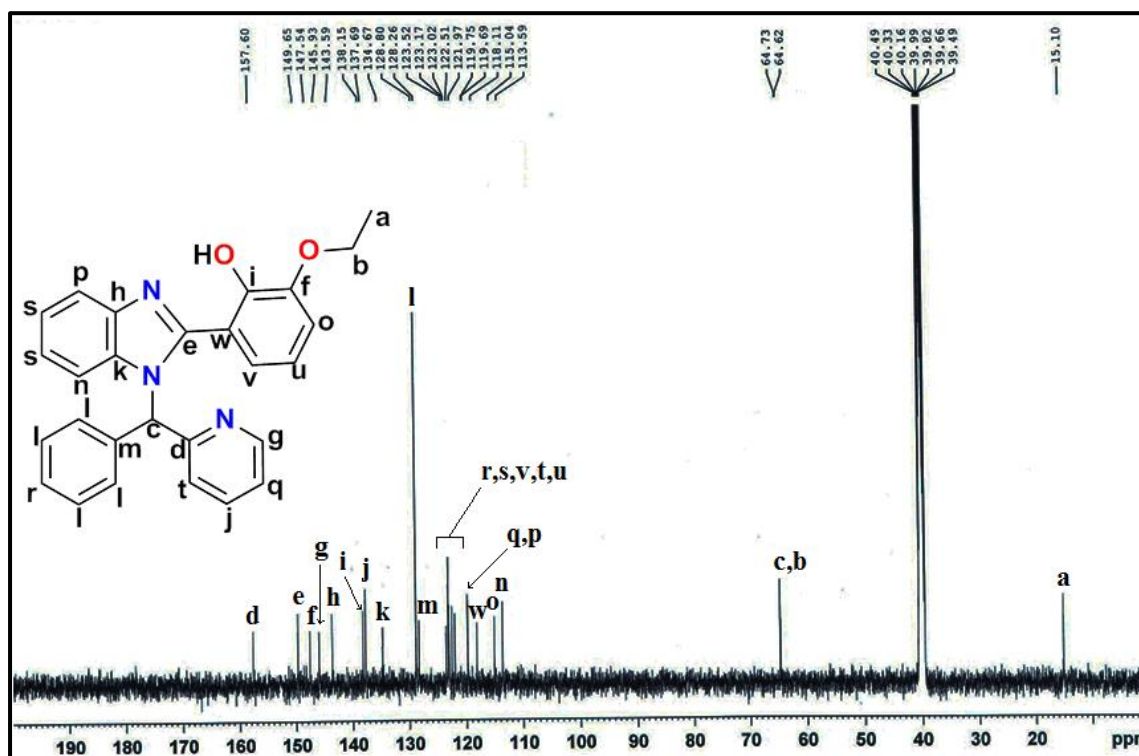

Fig. S2 <sup>13</sup>C NMR spectrum of HL.

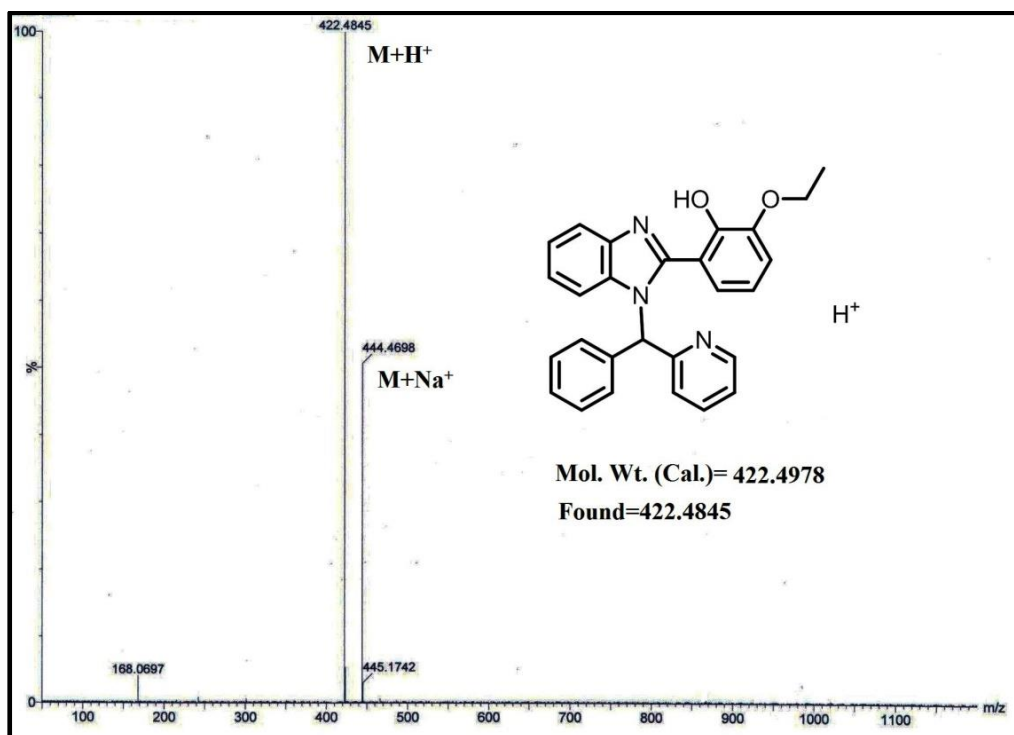

Fig. S3 ESI-MS spectrum of HL.

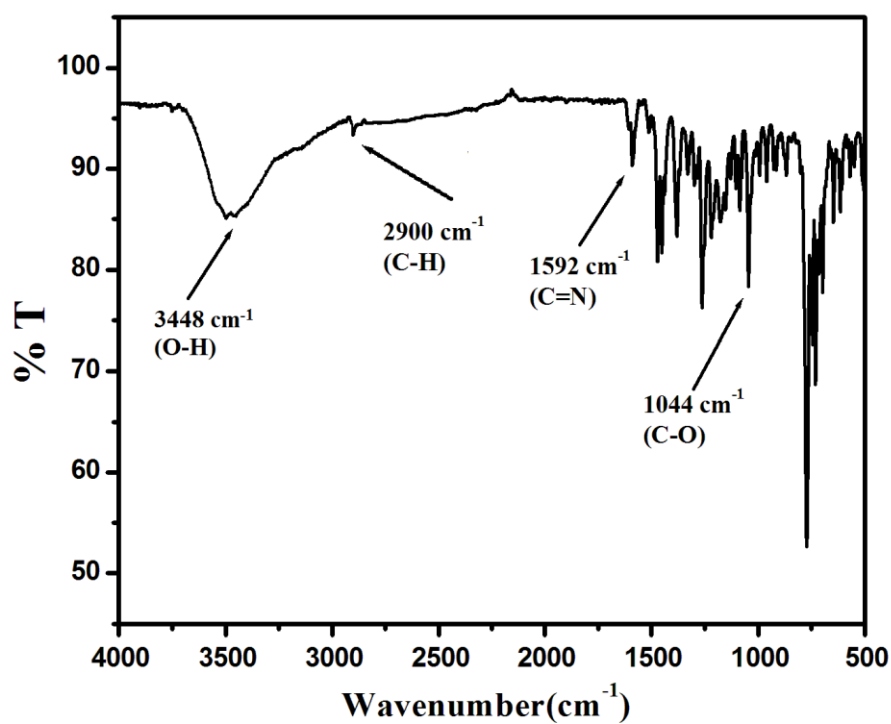

Fig. S4 IR Spectrum of HL.

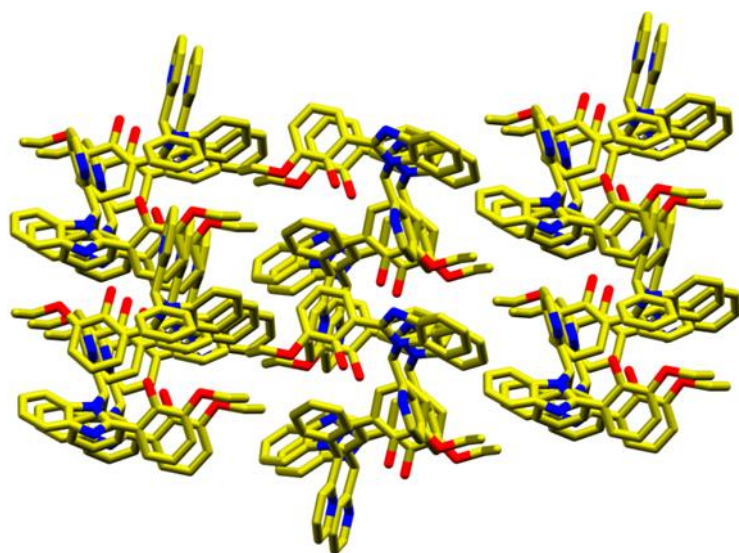

**Fig S5** Supramolecular assembly of HL along 'c-axis'.

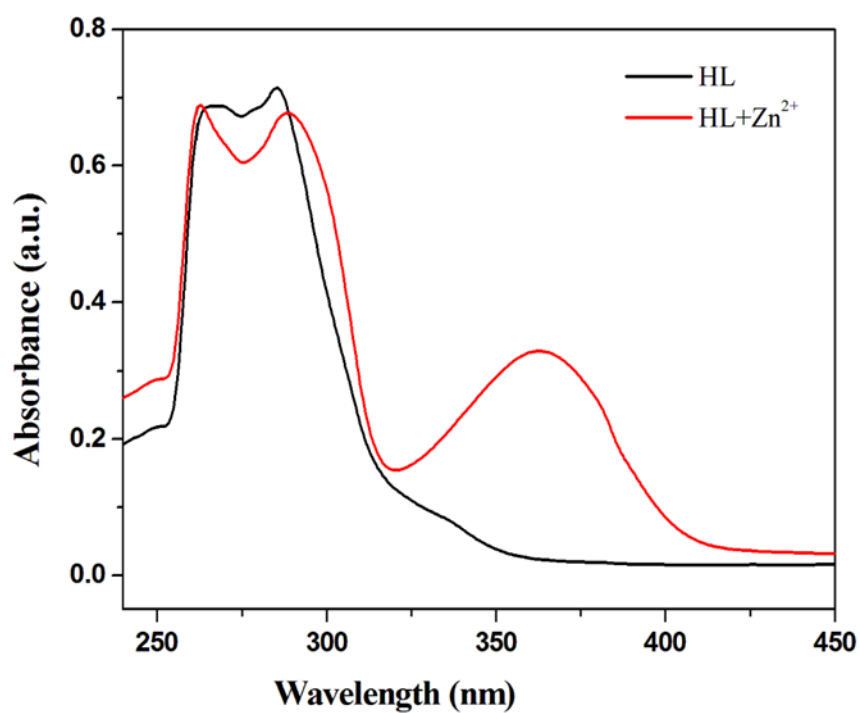

**Fig. S6** Change in the absorption spectrum of HL (50  $\mu\text{M}$ ) on gradual addition of  $\text{Zn}^{2+}$  (0-50  $\mu\text{M}$ ); inset: absorption spectrum of HL and its Zn-complex.

**Table S2** Some selective torsional angles present in the free probe HL (obtained from X-Ray structure).

| Bonds |      |     |     | Angle (°) |
|-------|------|-----|-----|-----------|
| C8    | N1   | C7  | C18 | 47.3(10)  |
| N2    | C007 | C5  | C4  | 58.1(10)  |
| N1    | C7   | C19 | C24 | 57.1(7)   |
| N2    | C007 | C5  | C6  | -116.5(8) |
| N1    | C7   | C18 | N3  | 38.1(9)   |
| N1    | C7   | C18 | C17 | -144.1(7) |
| N1    | C7   | C19 | C20 | -121.6(6) |
| N1    | C007 | C5  | C4  | -121.2(8) |
| C007  | N1   | C7  | C19 | 86.5(8)   |
| N1    | C007 | C5  | C6  | 64.2(10)  |

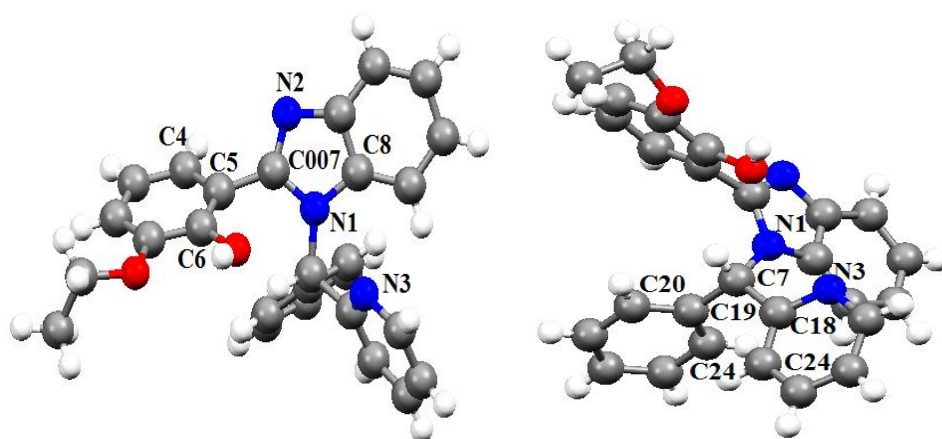

**Fig. S7** X-Ray structure of HL exhibiting twisting framework (two different view).

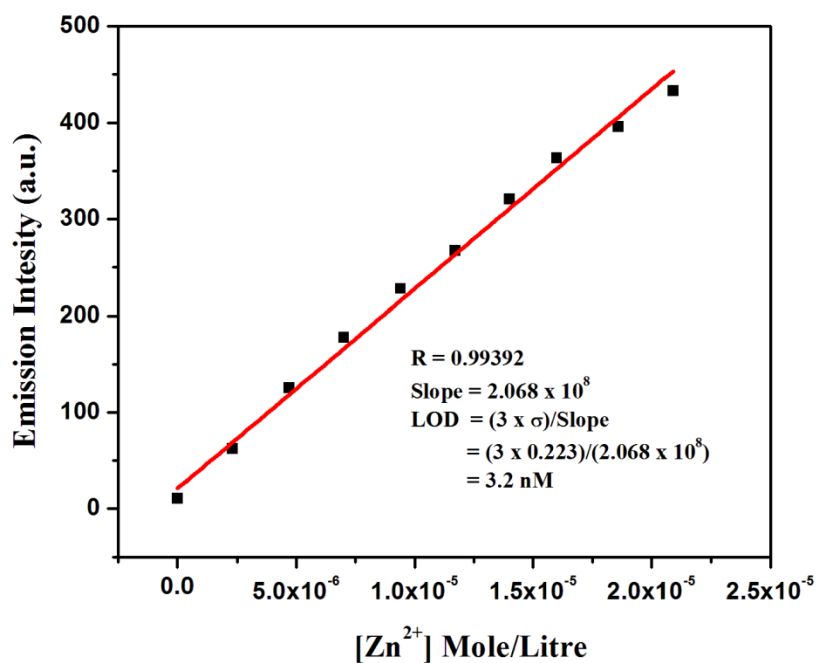

**Fig. S8** Limit of detection (LOD) for  $\text{Zn}^{2+}$  by the probe, HL.

**Table S3** Some of the reported  $\text{Zn}^{2+}/\text{H}_2\text{PO}_4^-$  selective probe along with LOD.

| SL No. | Probe | Selectivity (LOD)                                                                                                                        | Solvent                      | Ref. |
|--------|-------|------------------------------------------------------------------------------------------------------------------------------------------|------------------------------|------|
| 1.     |       | $\text{Zn}^{2+}$ (0.562 $\mu\text{M}$ )<br>$\text{H}_2\text{PO}_4^-$ (0.0314 $\mu\text{M}$ )<br>$\text{HSO}_4^-$ (0.0304 $\mu\text{M}$ ) | $\text{CH}_3\text{CN}$       | [1]  |
| 2.     |       | $\text{Zn}^{2+}$ (20 $\mu\text{M}$ )<br>$\text{HP}_2\text{O}_7^{3-}$ (1 $\mu\text{M}$ )<br>$\text{H}_2\text{PO}_4^-$ (1 $\mu\text{M}$ )  | EtOH                         | [2]  |
| 3.     |       | $\text{Zn}^{2+}$ (0.103 $\mu\text{M}$ )<br>$\text{HPO}_4^{2-}$ (0.207 $\mu\text{M}$ )                                                    | DMF/HEPES<br>Buffer<br>(5:1) | [3]  |



|    |                                                                                     |                                                                                                                                                                            |                                                     |     |
|----|-------------------------------------------------------------------------------------|----------------------------------------------------------------------------------------------------------------------------------------------------------------------------|-----------------------------------------------------|-----|
| 4. | 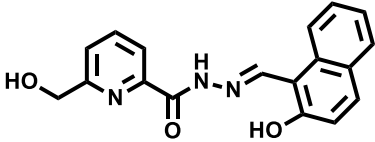   | Zn <sup>2+</sup> (5.7 nM)<br>Cd <sup>2+</sup> (1.09 μM)<br>Al <sup>3+</sup> (1.64 μM)<br>F <sup>-</sup> (21.1 μM)<br>H <sub>2</sub> PO <sub>4</sub> <sup>-</sup> (2.56 μM) | MeOH/HEPES<br><br>Buffer<br><br>(7:3)               | [4] |
| 5. |    | Zn <sup>2+</sup> (0.59 nM)<br>H <sub>2</sub> PO <sub>4</sub> <sup>-</sup> (26 μM)                                                                                          | MeOH/H <sub>2</sub> O<br><br>(4:1)                  | [5] |
| 6. |   | Zn <sup>2+</sup> (5.4 μM)<br>H <sub>2</sub> PO <sub>4</sub> <sup>-</sup> (-)                                                                                               | CH <sub>3</sub> CN/HEPES<br><br>Buffer<br><br>(1:1) | [6] |
| 7. |  | Zn <sup>2+</sup> (41 nM)<br>H <sub>2</sub> PO <sub>4</sub> <sup>-</sup> (49 nM)                                                                                            | DMSO/H <sub>2</sub> O<br><br>(8:2)                  | [7] |
| 8. |  | Zn <sup>2+</sup> (0.65 μM)<br>Cd <sup>2+</sup> (2.1 μM)<br>H <sub>2</sub> PO <sub>4</sub> <sup>-</sup> (-)<br>HPO <sub>4</sub> <sup>2-</sup> (-)                           | CH <sub>3</sub> OH/H <sub>2</sub> O<br><br>(7:3)    | [8] |
| 9. |  | Zn <sup>2+</sup> (8.8 nM)<br>H <sub>2</sub> PO <sub>4</sub> <sup>-</sup> (0.05 μM)                                                                                         | CH <sub>3</sub> CN/H <sub>2</sub> O<br><br>(8:2)    | [9] |

|     |                                                                                   |                                                                               |                                         |              |
|-----|-----------------------------------------------------------------------------------|-------------------------------------------------------------------------------|-----------------------------------------|--------------|
| 10. | 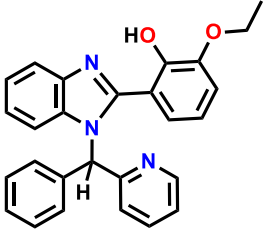 | $\text{Zn}^{2+}$ (3.2 nM)<br>$\text{H}_2\text{PO}_4^-$ (0.238 $\mu\text{M}$ ) | 9:1 (v/v)<br>DMSO/ $\text{H}_2\text{O}$ | This<br>Work |
|-----|-----------------------------------------------------------------------------------|-------------------------------------------------------------------------------|-----------------------------------------|--------------|

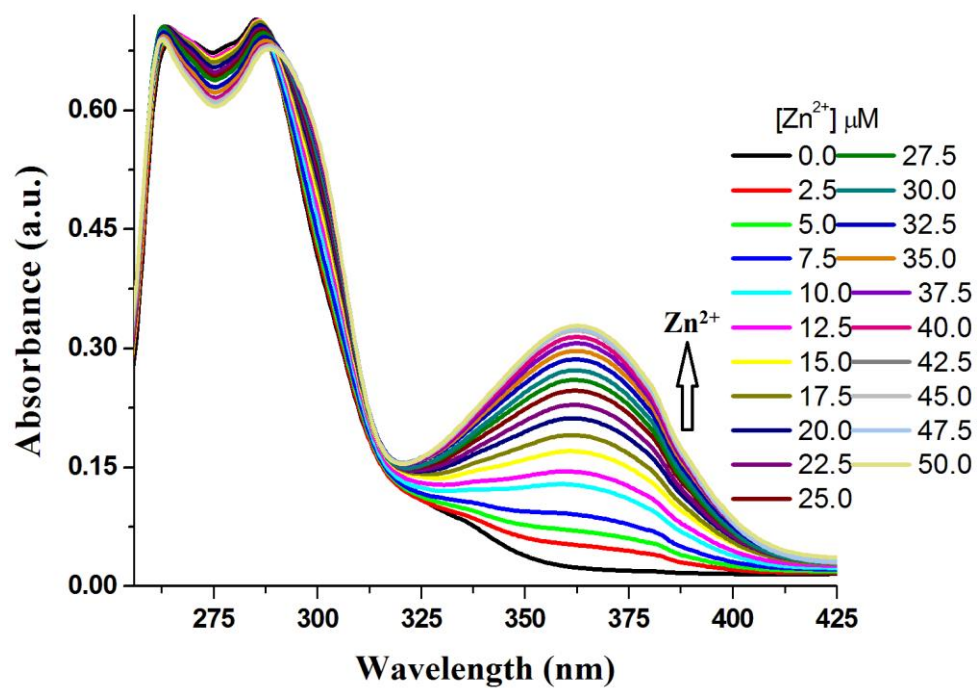

**Fig. S9** Change in the absorption spectrum of HL (50  $\mu\text{M}$ ) on gradual addition of  $\text{Zn}^{2+}$  ion (0-50  $\mu\text{M}$ ).

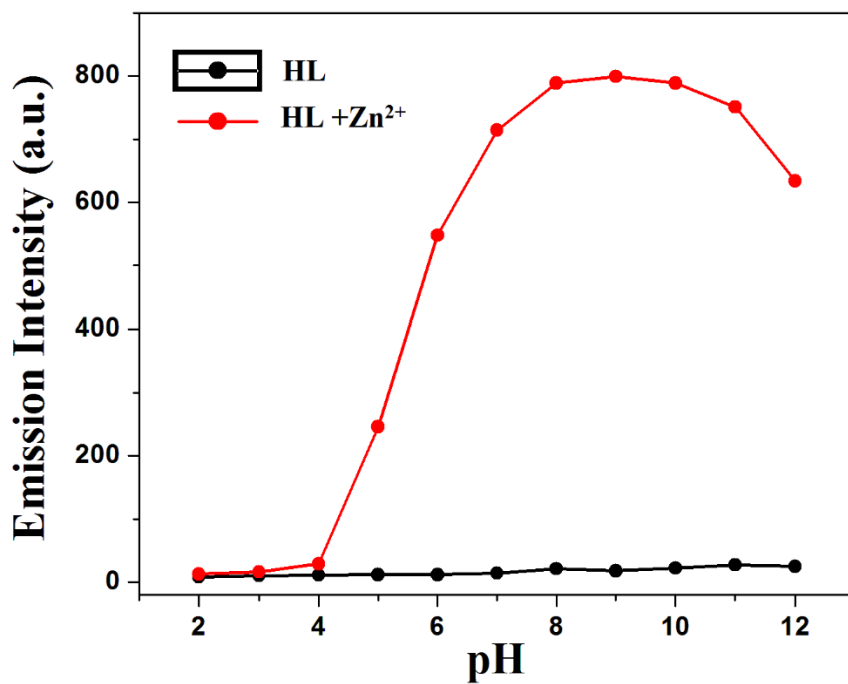

Fig. S10 pH effect on HL for Zn<sup>2+</sup> sensing.

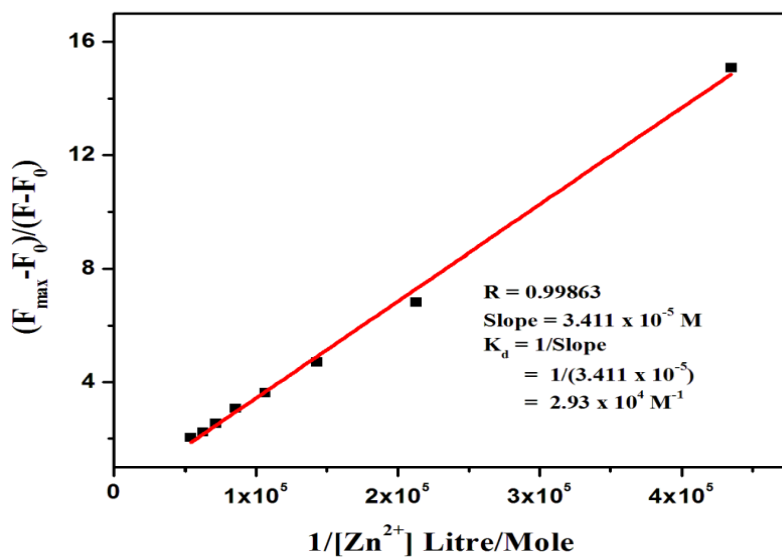

Fig. S11 Binding constant  $K_d$  evaluated from Benesi-Hildebrand plot of probe HL towards Zn<sup>2+</sup> ion.

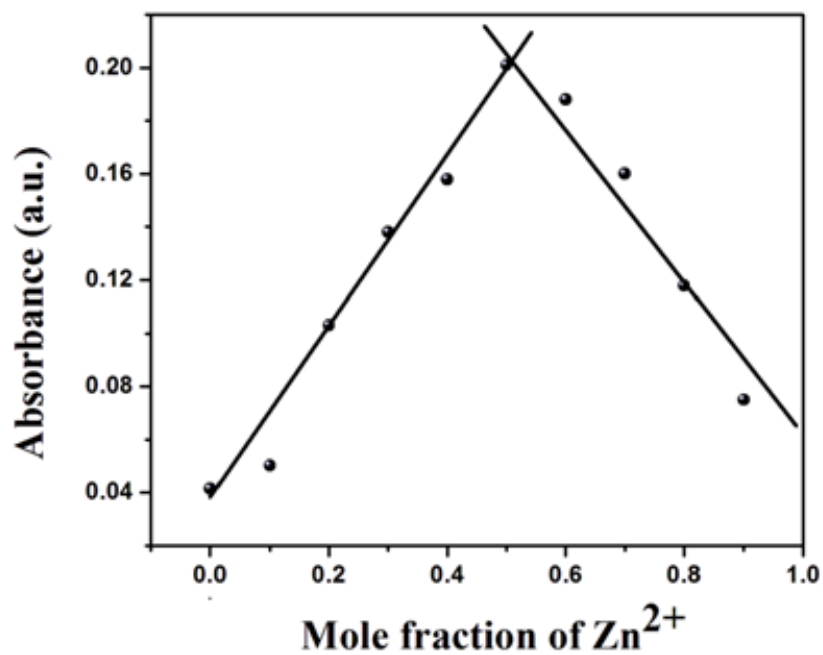

Fig. S12 Job's plot between Zn<sup>2+</sup> and HL.

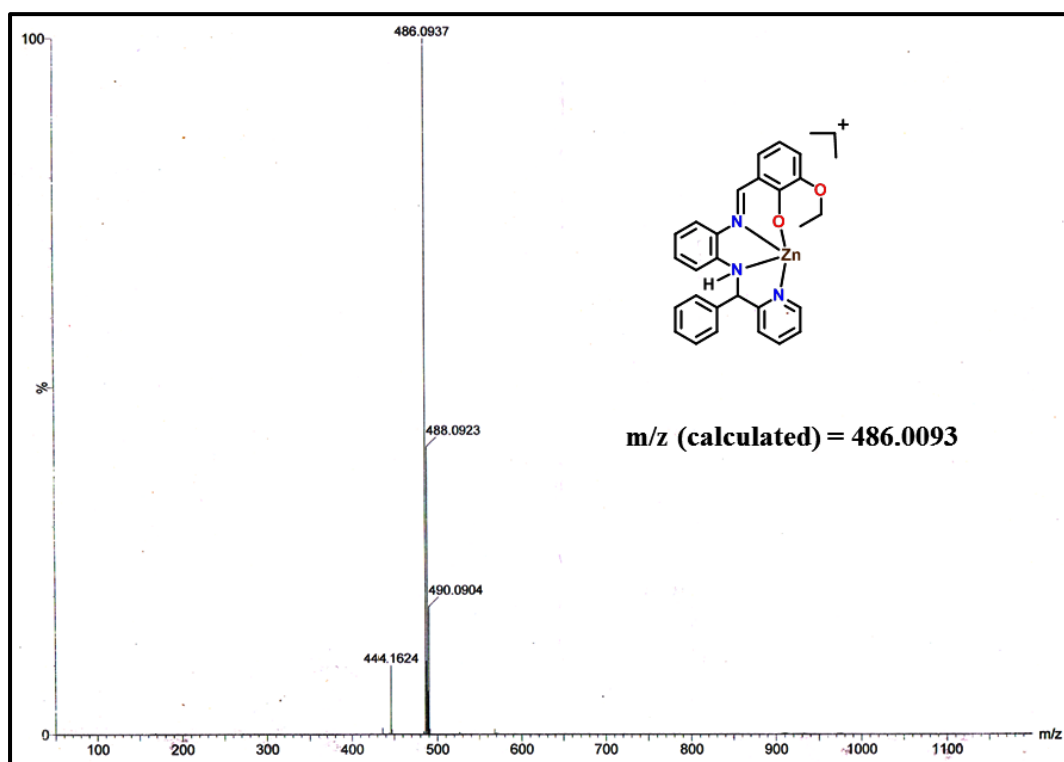

Fig. S13 ESI-MS spectrum of HL-Zn<sup>2+</sup> complex.

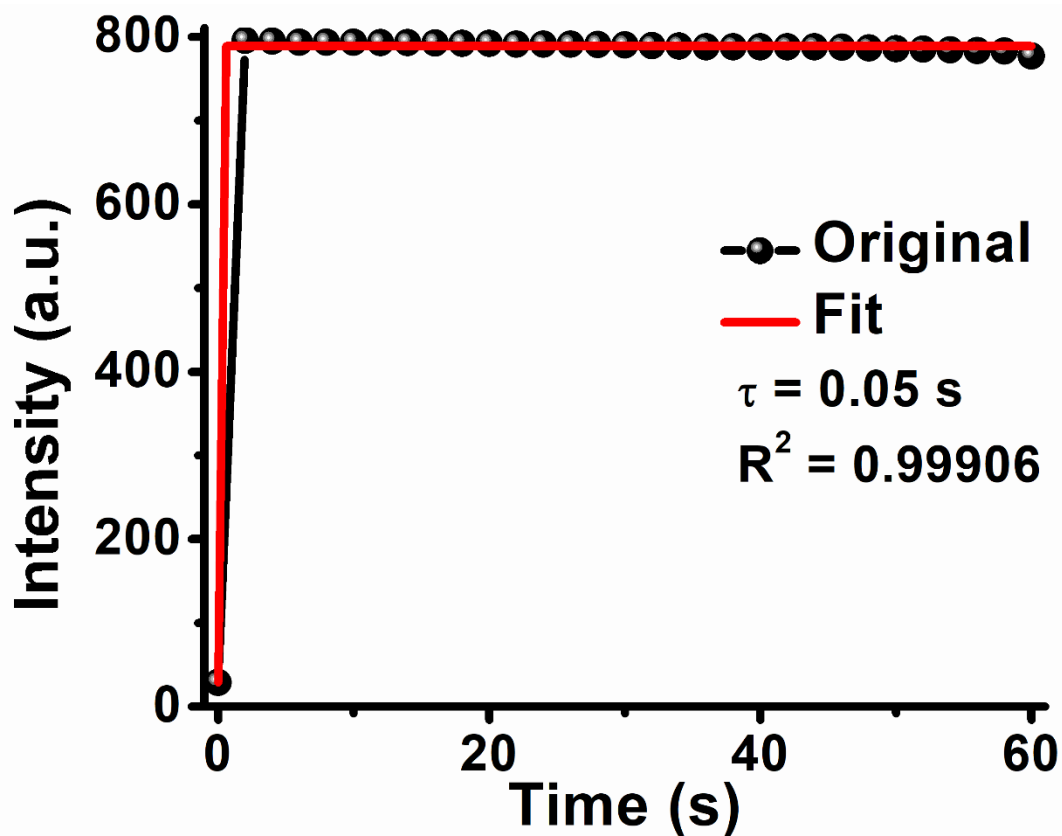

Fig. S14 Time-course of emission intensity of HL upon addition of 1 equivalent  $\text{Zn}^{2+}$ .

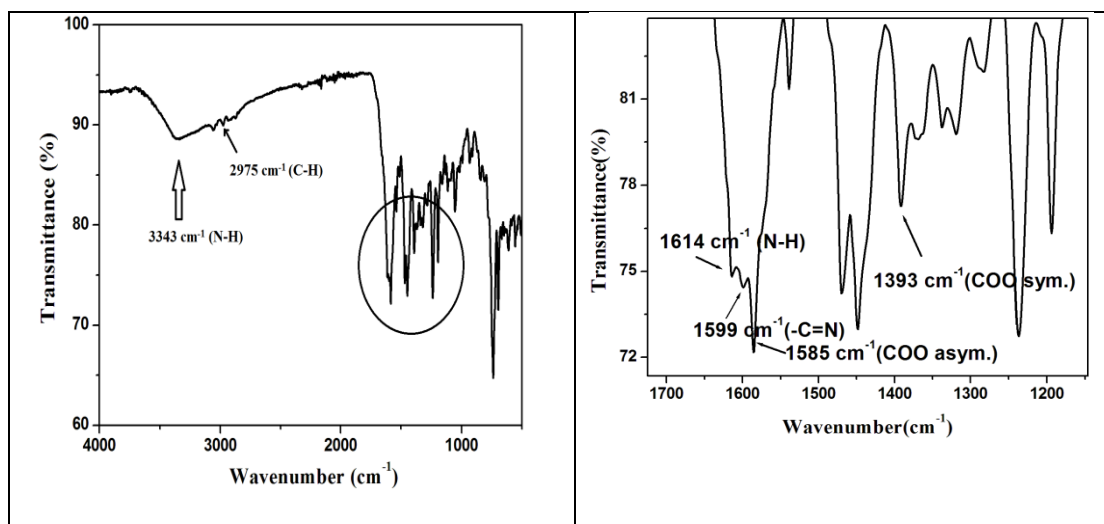

Fig. S15 IR spectrum of  $\text{HL-Zn}^{2+}$  complex; Right: zoom image in wavenumber around 1200-1700  $\text{cm}^{-1}$ .

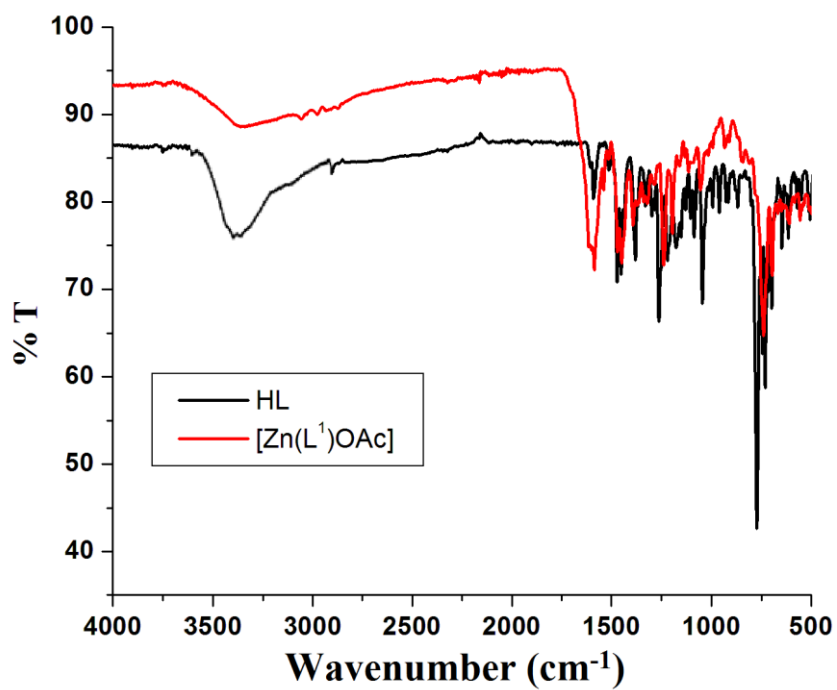

**Fig. S16** Merge IR spectrum of HL and HL- $\text{Zn}^{2+}$  complex ( $[\text{Zn}(\text{L}^1)\text{OAc}]$ ).

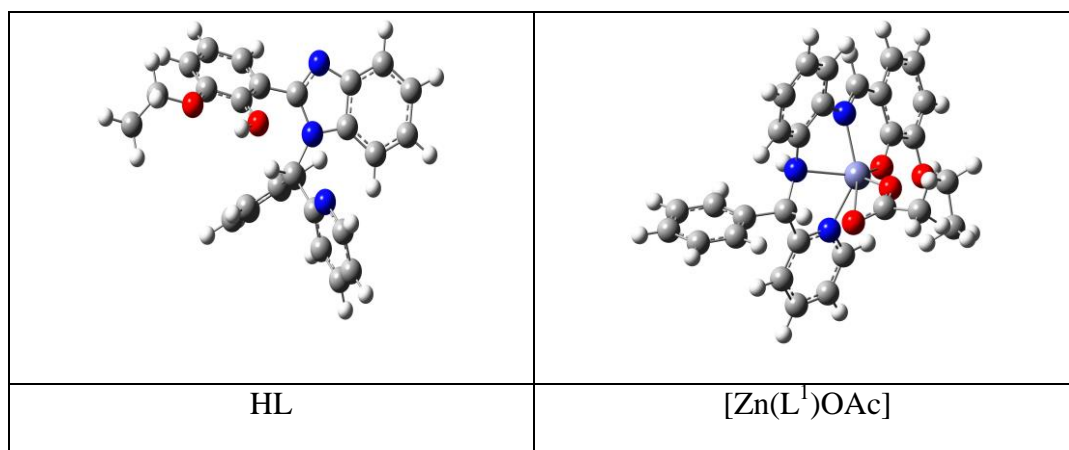

**Fig. S17** DFT optimized structure of probe HL and its zinc complex using B3LYP method.

**Table S4** Some selected bond length of HL obtained from single crystal and compared with theoretical optimized structure.

|         | <b>Experimental bond length (Å)</b> | <b>Theoretically calculated bond length (Å)</b> |
|---------|-------------------------------------|-------------------------------------------------|
| C007-N1 | 1.374(9)                            | 1.39                                            |
| N1-C7   | 1.475(10)                           | 1.46                                            |
| C7-C18  | 1.527(10)                           | 1.53                                            |
| C18-N3  | 1.392(12)                           | 1.33                                            |
| C7-H7   | 0.98                                | 1.08                                            |
| C007-N2 | 1.307(9)                            | 1.31                                            |
| C007-C5 | 1.497(10)                           | 1.47                                            |
| C5-C6   | 1.390(10)                           | 1.39                                            |
| C6-O2   | 1.366(9)                            | 1.36                                            |
| O2-H2   | 0.82                                | 0.96                                            |
| C1-C6   | 1.392(10)                           | 1.40                                            |
| C1-O1   | 1.383(9)                            | 1.37                                            |

**Table S5** Selected bond angles of probe HL from the crystal unit and its comparison with the optimized structure.

| <b>Bond Angles</b> | <b>Experimental angle(°)</b> | <b>Theoretically calculated Angle(°)</b> |
|--------------------|------------------------------|------------------------------------------|
| C007-N1-C7         | 124.5(5)                     | 124.89                                   |
| N1-C7-C18          | 112.1(6)                     | 111.70                                   |
| C7-C18-N3          | 118.7(7)                     | 115.06                                   |
| C18-N3-C14         | 118.4(8)                     | 118.48                                   |
| N1-C007-N2         | 112.6(6)                     | 113.01                                   |
| C007-N2-C9         | 105.2(6)                     | 105.60                                   |

|            |          |        |
|------------|----------|--------|
|            |          |        |
| N2-C007-C5 | 123.4(6) | 121.69 |
| C007-C5-C6 | 120.9(6) | 123.14 |
| C6-C5-O2   | 118.0(6) | 120.16 |
| C6-C1-O1   | 114.5(7) | 113.28 |
| C6-O2-H2   | 110      | 107.78 |

**Table S6** Selected frontier molecular orbitals of HL along with their energies.

|                                                                                     |                                                                                     |                                                                                      |                                                                                       |
|-------------------------------------------------------------------------------------|-------------------------------------------------------------------------------------|--------------------------------------------------------------------------------------|---------------------------------------------------------------------------------------|
| 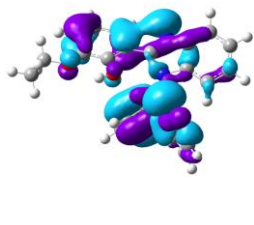  |   |   |   |
| HOMO-5                                                                              | HOMO-4                                                                              | HOMO-3                                                                               | HOMO-2                                                                                |
| -7.150 eV                                                                           | -6.957 eV                                                                           | -6.888 eV                                                                            | -6.047 eV                                                                             |
|  |  |  |  |
| HOMO-1                                                                              | HOMO                                                                                | LUMO                                                                                 | LUMO+1                                                                                |
| -5.980 eV                                                                           | -5.826 eV                                                                           | -1.280 eV                                                                            | -0.919 eV                                                                             |
|  |  |  |  |
| LUMO+2                                                                              | LUMO+3                                                                              | LUMO+4                                                                               | LUMO+5                                                                                |
| -0.821 eV                                                                           | -0.630 eV                                                                           | 0.518 eV                                                                             | 0.442 eV                                                                              |



**Table S7** Selected frontier molecular orbitals of [Zn(L<sup>1</sup>)OAc] complex along with their energies.

|                                                                                    |                                                                                    |                                                                                     |                                                                                      |
|------------------------------------------------------------------------------------|------------------------------------------------------------------------------------|-------------------------------------------------------------------------------------|--------------------------------------------------------------------------------------|
| 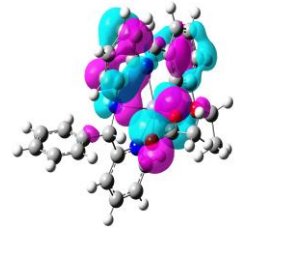  |   |   |   |
| HOMO-5<br>-6.62 eV                                                                 | HOMO-4<br>-6.52 eV                                                                 | HOMO-3<br>-6.42 eV                                                                  | HOMO-2<br>-5.94 eV                                                                   |
|   |   |   |   |
| HOMO-1<br>-5.87 eV                                                                 | HOMO<br>-5.0 eV                                                                    | LUMO<br>-1.74 eV                                                                    | LUMO+1<br>-1.61 eV                                                                   |
|  |  |  |  |
| LUMO+2<br>-1.03 eV                                                                 | LUMO+3<br>-0.69 eV                                                                 | LUMO+4<br>-0.58 eV                                                                  | LUMO+5<br>-0.3 eV                                                                    |

**Table S8** Probable electronic transition of HL from TD-DFT calculation.

| Excitation Energy (eV) | Wavelength Exp. (nm) | Wavelength Theor. (nm) | Oscillator strength | Key Transition    | Nature of Transition |
|------------------------|----------------------|------------------------|---------------------|-------------------|----------------------|
| 4.2538                 | 335                  | 291.47                 | 0.0589              | HOMO-1→<br>LUMO   | ILCT                 |
| 4.3614                 | 285                  | 284.28                 | 0.0937              | HOMO-2→<br>LUMO   | ILCT                 |
| 4.6384                 | 265                  | 267.30                 | 0.0935              | HOMO-2→<br>LUMO+1 | ILCT                 |

**Table S9** Probable electronic transition of  $[\text{Zn}(\text{L}^1)\text{OAc}]$  from TD-DFT calculation.

| Excitation Energy | Wavelength Exp. (nm) | Wavelength Theor. (nm) | Oscillation Frequency | Key Transition  | Nature of Transition |
|-------------------|----------------------|------------------------|-----------------------|-----------------|----------------------|
| 3.6399 eV         | 362                  | 340.62                 | 0.4568                | HOMO-1<br>→LUMO | ILCT                 |
| 4.1028 eV         | 289                  | 302.19                 | 0.1619                | HOMO-2→<br>LUMO | ILCT                 |

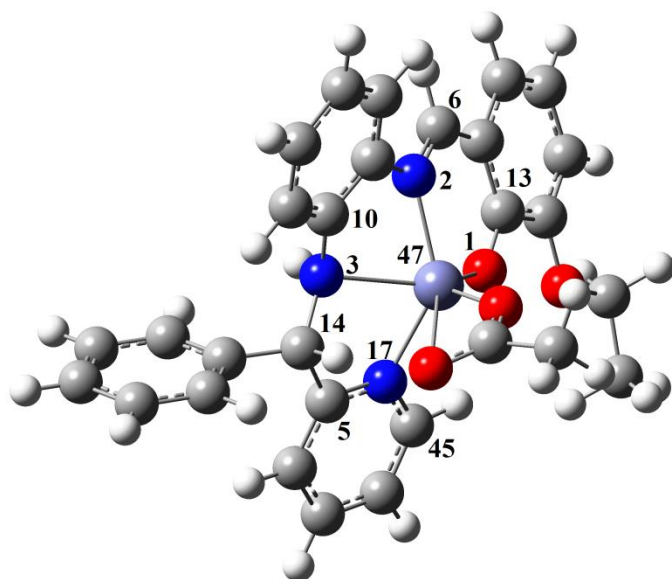

**Fig. S18** DFT optimized structure of Zn-complex exhibiting twisting framework.

**Table S10** Some selective torsional angles present in the Zn-complex (from DFT-optimized structure).

| Bonds            | Angle (°) |
|------------------|-----------|
| 6 – 2 – 47 – 3   | -147.25   |
| 45 – 17 – 47 – 3 | 162.40    |
| 2 – 47 – 3 – 14  | -168.12   |
| 17 – 47 – 3 – 10 | 170.12    |
| 13 – 1 – 47 – 17 | 149.07    |
| 1 – 47 – 17 – 5  | -158.45   |

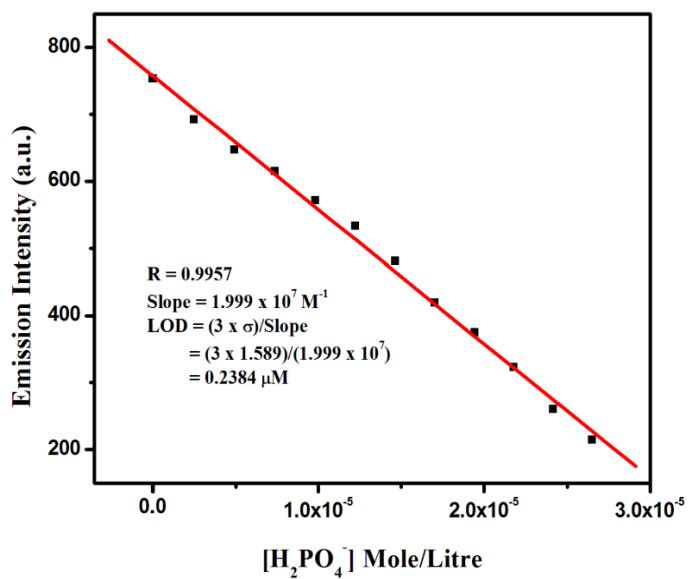

**Fig. S19** Limit of detection (LOD) determination for  $\text{H}_2\text{PO}_4^-$  by  $[\text{Zn}(\text{L}^1)\text{OAc}]$  complex.

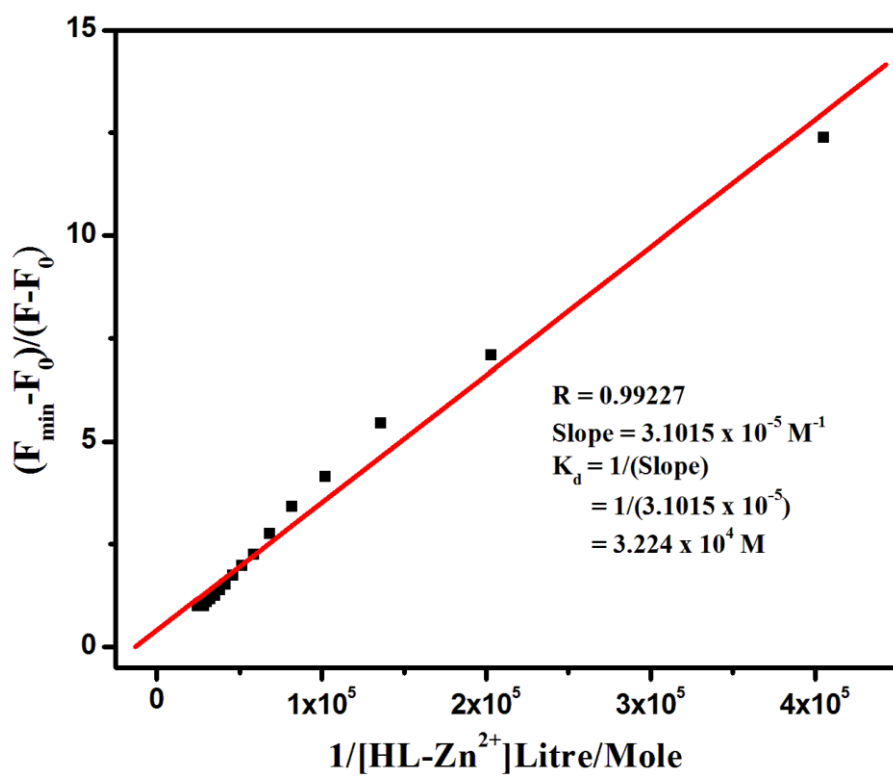

**Fig. S20** Binding constant,  $K_d$  for  $\text{H}_2\text{PO}_4^-$ .

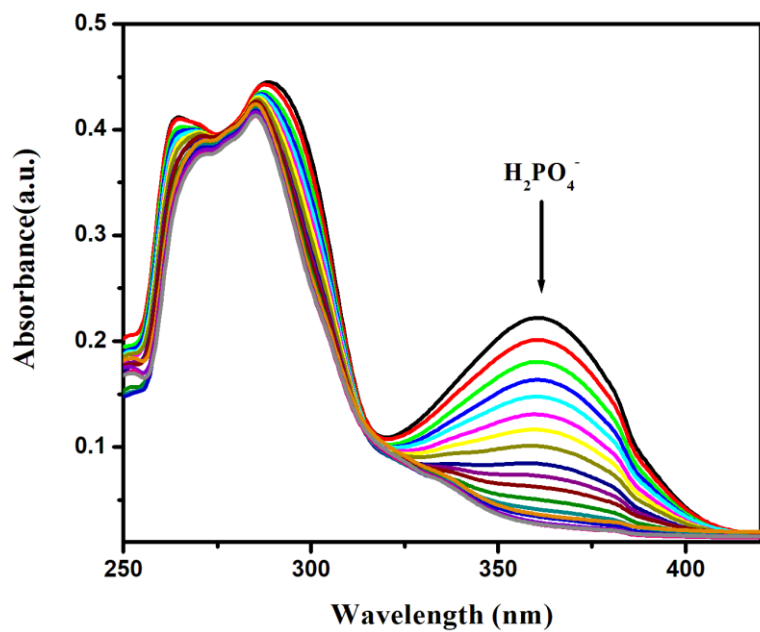

**Fig. S21** Change in UV-Vis absorption spectra of  $[\text{Zn}(\text{L}^1)\text{OAc}]$  on gradual addition of  $\text{H}_2\text{PO}_4^-$ .

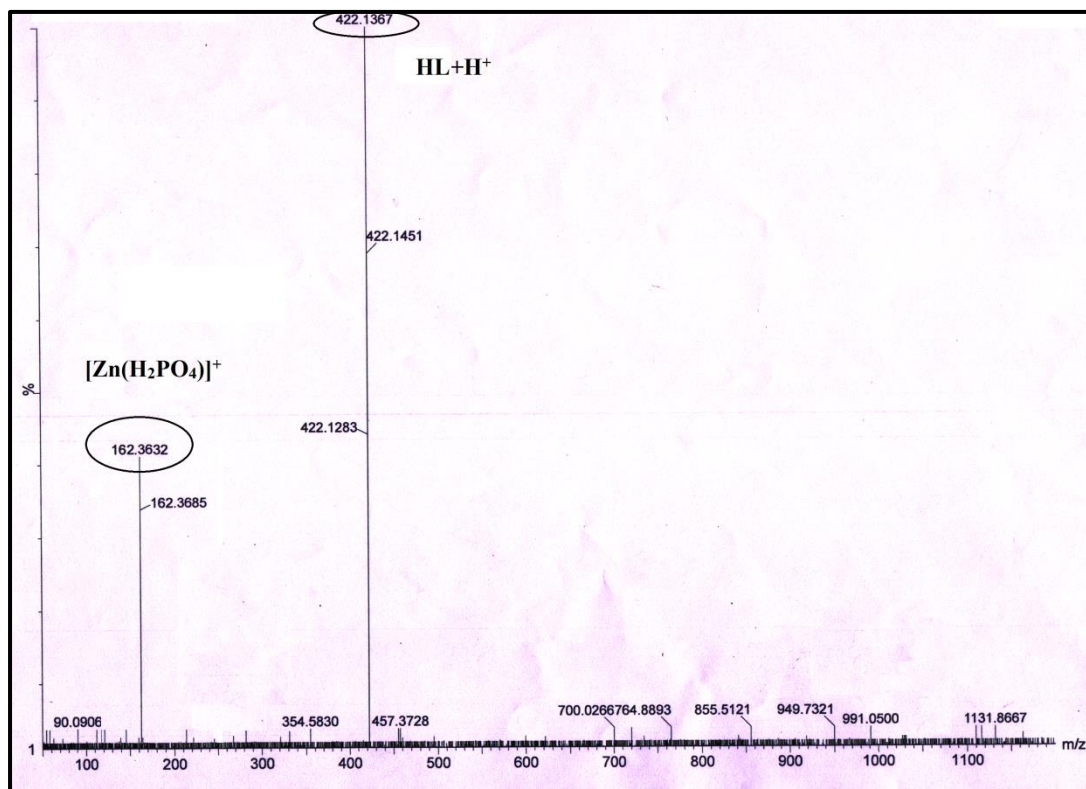

**Fig. S22** ESI-MS spectrum in addition of  $\text{H}_2\text{PO}_4^-$  to the in-situ generated  $\text{HL}-\text{Zn}^{2+}$  complex.

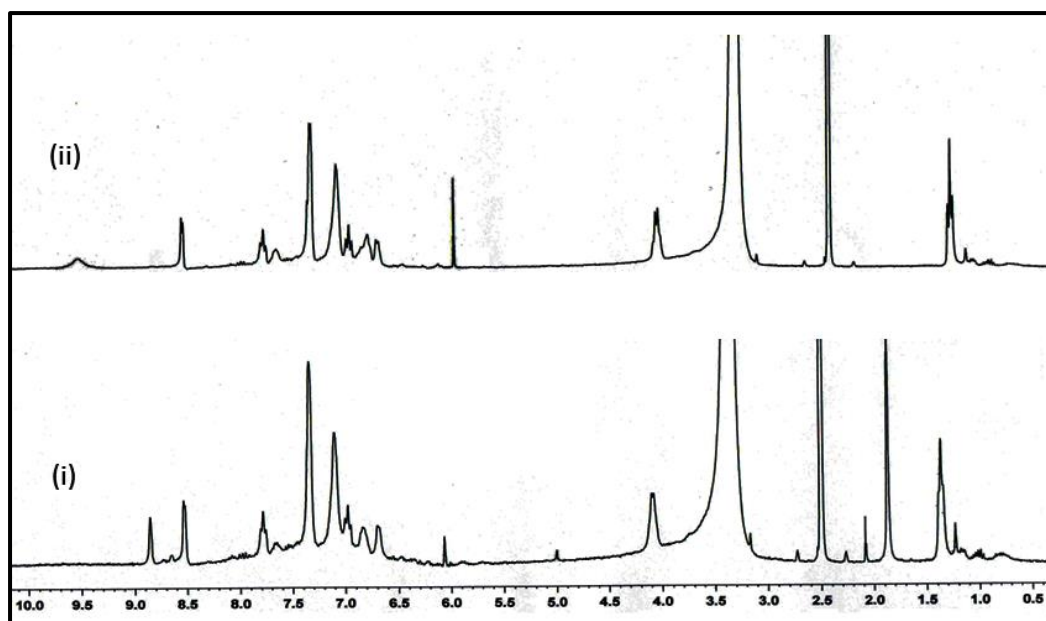

**Fig. S23**  $^1\text{H}$  NMR spectra (i)  $\text{HL}+\text{Zn}^{2+}$  (1.0 eqv.) and (ii)  $\text{HL}+\text{Zn}^{2+}$  (1.0 eqv.)+  $\text{H}_2\text{PO}_4^-$  (1.0 eqv.).

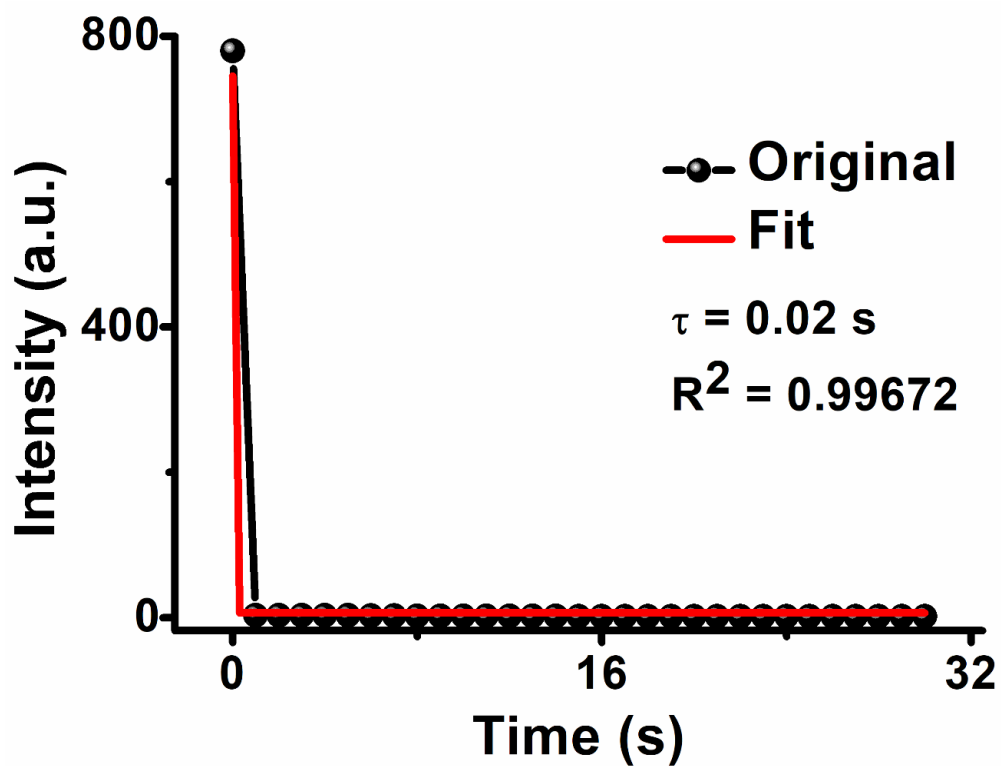

**Fig. S24** Time-course of intensity quenching of  $[\text{Zn}(\text{L}^1)\text{OAc}]$  upon addition of 1 equivalent  $\text{H}_2\text{PO}_4^-$ .

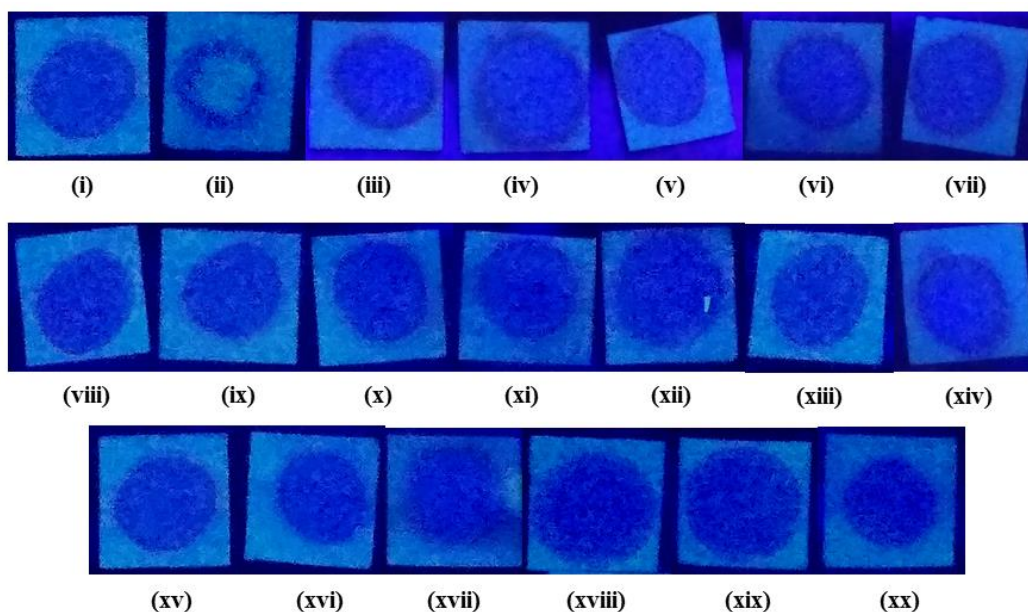

**Fig. S25** Paper kit detection: Zn-complex in presence of different anions; (i)  $[\text{Zn}(\text{L}^1)\text{OAc}]$ , (ii)  $\text{H}_2\text{PO}_4^-$ , (iii)  $\Gamma^-$ , (iv)  $\text{Br}^-$ , (v)  $\text{Cl}^-$ , (vi)  $\text{H}_2\text{PO}_4^-$ , (vii)  $\text{S}^{2-}$ , (viii)  $\text{PO}_4^{3-}$ , (ix)  $\text{S}_2\text{O}_3^{2-}$ , (xx)  $\text{IO}_3^-$ , (xi) citrate, (xii)  $\text{AcO}^-$ , (xiii)  $\text{F}^-$ , (xiv)  $\text{AsO}_2^-$ , (xv)  $\text{AsO}_3^{3-}$ , (xvi)  $\text{CN}^-$ , (xvii)  $\text{SCN}^-$ , (xviii)  $\text{SO}_4^{2-}$ , (xix)  $\text{NO}_2^-$ , (xx)  $\text{NO}_3^-$ .

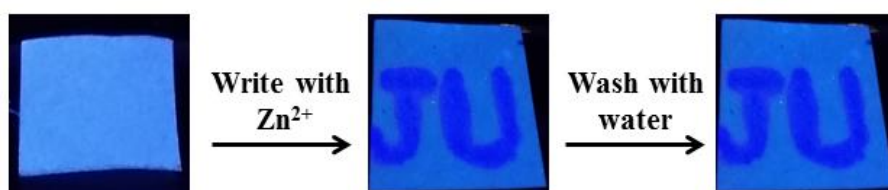

**Fig. S26** Photographs of **HL** coated filter paper with hand written images and after washing with water;  $\lambda_{\text{ex}}$ , 365 nm.

## References

- 1 Y. Liu, X. Wang, E. Feng, C. Fan and S. Pu, *Spectrochim. Acta A*, 2021, **246**, 119052.
- 2 M. An, B. Kim, H. Seo, A. Helal and H. Kim, *Spectrochim. Acta A*, 2016, **169**, 87–94.

- 3 J. Fu, K. Yao, B. Li, H. Mei, Y. Chang and K. Xu, *Spectrochim. Acta A*, 2020, **228**, 117790.
- 4 N. Behera and V. Manivannan, *J. Photoch. Photobio. A*, 2018, **353**, 77–85.
- 5 R. Purkait, A. D. Mahapatra, D. Chattopadhyay and C. Sinha, *Spectrochim. Acta A*, 2019, **207**, 164–172.
- 6 S. Goswami, S. Maity, A. C Maity, A. K. Das, K. Khanra, T. K. Mandal and N. Bhattacharyya, *Tetrahedron Lett.*, 2014, **55**, 5993–5997.
- 7 K. Du, S. Niu, L. Qiao, Y. Dou, Q. Zhu, X. Chen and P. Zhang, *RSC Adv.*, 2017, **7**, 40615–40620.
- 8 A. Gogoi, S. Samanta and G. Das, *Sens. Actuators B*, 2014, **202**, 788–794.
- 9 S. S. Kumara, R. S. Kumara and S. K. A. Kumara, *Inorg. Chim. Acta*, 2020, **502**, 119348.
